# Supplementary material for: Highly efficient soluble expression, purification and characterization of recombinant Aβ42 fromEscherichia coli
Source: Royal Society of Chemistry journal article supplement (doi:10.1039/c8ra00042e), 2018-01-01
Supplement: c8ra00042e1.pdf [file c8ra00042e1.pdf]

1 **Supplementary Information**

2 **Highly Efficient Soluble Expression, Purification and**  
3 **Characterization of Recombinant A $\beta$ 42 from *Escherichia***  
4 ***coli***

5 **Longgang Jia,<sup>1,2,3,4</sup> Wenjuan Wang,<sup>1,2,3,4</sup> Jinzhao Shang,<sup>1,2,3,4</sup> Wenping**  
6 **Zhao,<sup>1,2,3,4</sup> Wei Wei,<sup>1,2,3,4</sup> Ying Wang,<sup>1,2,3,4</sup> Li Li,<sup>5</sup> Fuping Lu,<sup>1,2,3,4\*</sup>**  
7 **Fufeng Liu<sup>1,2,3,4\*</sup>**

8 <sup>1</sup> State Key Laboratory of Food Nutrition and Safety (Tianjin University of Science &  
9 Technology), Tianjin, 300457, P. R. China;

10 <sup>2</sup> Key Laboratory of Industrial Fermentation Microbiology (Tianjin University of  
11 Science & Technology), Ministry of Education, Tianjin, 300457, P.R. China;

12 <sup>3</sup> Tianjin Key Laboratory of Industrial Microbiology, Tianjin University of Science &  
13 Technology Tianjin, 300457, P.R. China;

14 <sup>4</sup> College of Biotechnology, Tianjin University of Science & Technology, Tianjin  
15 300457, China;

16 <sup>5</sup> College of Marine and Environmental Sciences, Tianjin University of Science &  
17 Technology, Tianjin 300457, P. R. China.

18

19 **Corresponding Authors**

20 \*F. Liu, Phone: +86-22-60602717; Fax: +86-22-60602298; E-mail:  
21 fufengliu@tust.edu.cn;

22 \*F. Lu, Phone: +86-22-60602271; Fax: +86-22-60602298; E-mail: lfp@tust.edu.cn

23 **Table S1.** The nucleotide sequence of (NANP)<sub>3</sub>-TEV-A $\beta$ <sub>42</sub> and primers used in  
 24 amplification PCR

| name                                             | 5'-3'                                                                                                                                                                                              |
|--------------------------------------------------|----------------------------------------------------------------------------------------------------------------------------------------------------------------------------------------------------|
| (NANP) <sub>3</sub> -TEV-A $\beta$ <sub>42</sub> | AATGCCAATCCGAATGCCAACCCGAACGCCAACCCGGAAAA<br>CCTGTACTTCCAGGATGCCGAGTTTCGCCATGATAGCGGCTA<br>TGAGGTGCACCACCAGAACTGGTGTCTTTGCCGAGGATGT<br>GGGCAGCAACAAAGGCGCCATTATTGGCCTGATGGTGGGTG<br>GCGTGGTGATTGCC |
| <i>EcoRI</i> -A $\beta$ <sub>42</sub> -F         | CGGAATTCAATGCCAATCCGAATGCCA                                                                                                                                                                        |
| <i>HindIII</i> -A $\beta$ <sub>42</sub> -R       | CCAAGCTTTTAGGCAATCACCACGCC                                                                                                                                                                         |

25

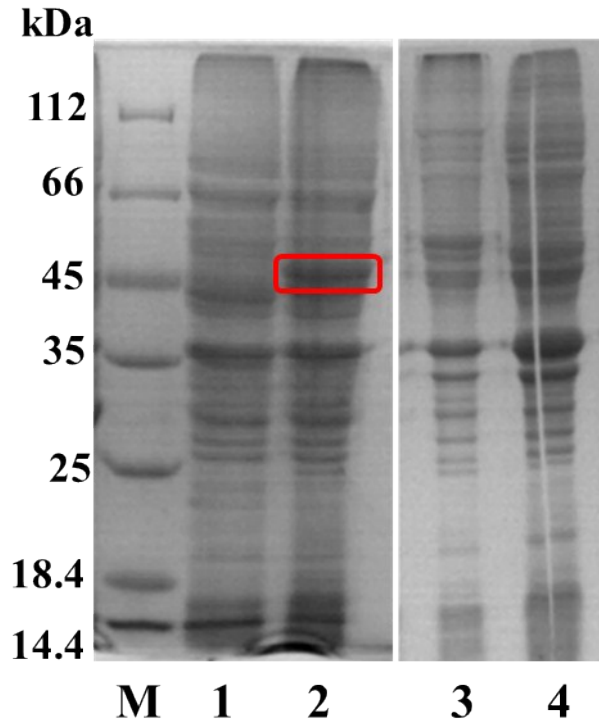

26

27 **Fig S1.** SDS-PAGE analysis of the soluble and insoluble fraction. BL21-MBP-A $\beta$ 42  
28 and BL21 cells were sonicated and divided into pellet and supernatant fraction after  
29 induction by 0.5 mM IPTG. M: protein marker; 1: BL21 soluble fraction; 2: BL21-  
30 MBP-A $\beta$ 42 soluble fraction; 3: BL21 cells debris fraction; 4: BL21-MBP-A $\beta$ 42 cells  
31 debris fraction.

32

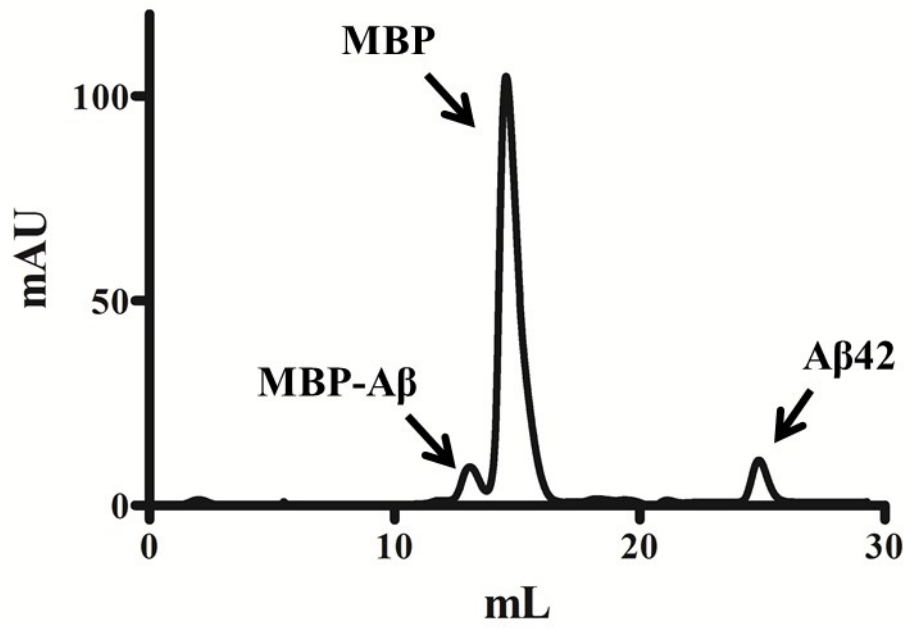

33

34 **Fig S2.** Chromatographic profile of the recombinant Aβ42 purified by size-exclusion

35 chromatography on a Superdex 200 Increase column.

36

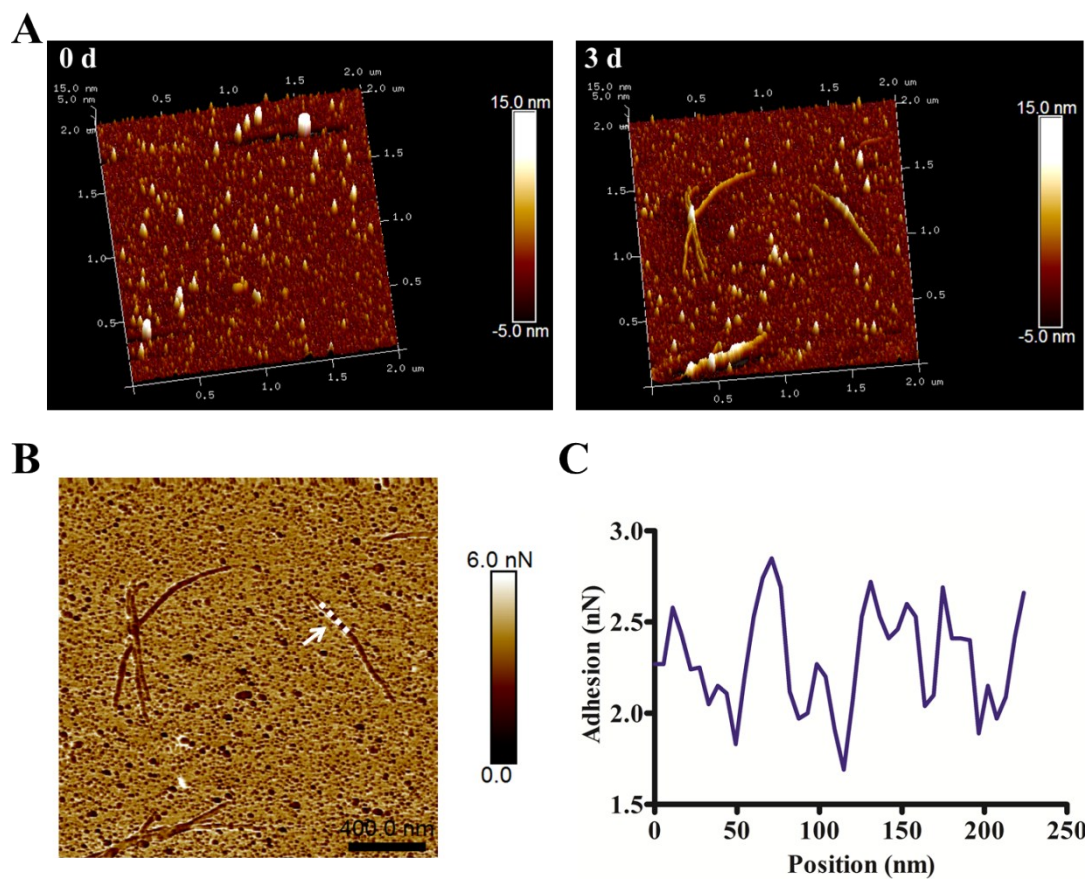

38

39 **Fig S3.** AFM images of recombinant A $\beta$ 42 aggregates. A: 3D images of A $\beta$ 42  
 40 aggregates after incubation for 0 and 3 days. B: AFM adhesion image of A $\beta$ 42 fibrils  
 41 after 3 days' incubation. C: Adhesion profile of the dashed white line marked the  
 42 position along the fibril was analyzed.
